# Supplementary material for: Overweight in childhood of exclusively breastfed infants with a high weight at 5 months
Source: PubMed Central journal article supplement (PMC7729543; doi:10.1111/mcn.13057), 2020-08-20
Supplement: MCN-17-e13057-s001.pdf [file MCN-17-e13057-s001.pdf]

**Supplementary Table 1. Characteristics of the full study population and of the selected sample with information on exposure and outcome variables**

| Characteristics                                                 | Full population |                                 | 7 year BMI sample |                                 |                      | 11 year BMI sample |                                 |                      |
|-----------------------------------------------------------------|-----------------|---------------------------------|-------------------|---------------------------------|----------------------|--------------------|---------------------------------|----------------------|
|                                                                 | n               | Median/<br>Mean/ % <sup>1</sup> | n                 | Median/<br>Mean/ % <sup>1</sup> | p-value <sup>2</sup> | n                  | Median/<br>Mean/ % <sup>1</sup> | p-value <sup>3</sup> |
| <b>Maternal pre-pregnancy BMI, (kg/m<sup>2</sup>)</b>           | 75,941          | 22.6 (14.2-64.4)                | 13,401            | 22.7 (14.5-63.3)                | 0.006                | 9,819              | 22.6 (15.5-63.3)                | 0.06                 |
| <b>Paternal BMI, (kg/m<sup>2</sup>)</b>                         | 53,622          | 24.8 (14.9-57.9)                | 13,401            | 24.7 (16.1-57.9)                | 0.3                  | 9,819              | 24.7 (16.7-57.9)                | 0.01                 |
| <b>Maternal education/occupational class, (%)</b>               | 76,947          | 100%                            | 13,401            | 100%                            |                      | 9,819              | 100%                            |                      |
| Highest level                                                   |                 | 51.9                            |                   | 56.2                            |                      |                    | 59.4                            |                      |
| Middle level                                                    |                 | 38.1                            |                   | 37.0                            |                      |                    | 34.5                            |                      |
| Lowest level                                                    |                 | 10.1                            |                   | 6.9                             | <0.001               |                    | 6.1                             | <0.001               |
| <b>Single mother at, 18 months after birth, (%)</b>             | 56,277          | 4.1                             | 13,400            | 1.9                             | <0.001               | 9,819              | 1.4                             | <0.001               |
| <b>Smoking in pregnancy, (cig/day,1<sup>st</sup> trimester)</b> | 77,028          | 2.2 ± 4.7                       | 13,401            | 1.7 ± 4.1                       | <0.001               | 9,819              | 1.5 ± 3.8                       | <0.001               |
| <b>Ever smoking during pregnancy, (yes %)</b>                   | 77,207          | 27.6                            | 13 401            | 21.1                            | <0.001               | 9,819              | 19.3                            | <0.001               |
| <b>Maternal physical exercise during pregnancy (h/week)</b>     | 72,568          | 100%                            |                   | 100%                            |                      | 9,819              | 100%                            |                      |
| 0                                                               |                 | 69.9                            | 13,401            | 66.3                            |                      |                    | 65.3                            |                      |
| 0>-3                                                            |                 | 19.5                            |                   | 22.6                            |                      |                    | 23.1                            |                      |
| ≥3                                                              |                 | 10.6                            |                   | 11.1                            | <0.001               |                    | 11.5                            | <0.001               |
| <b>Weekly gestational weight gain, (kg)</b>                     | 59,526          | 0.38 ± 0.14                     | 13,401            | 0.37 ± 0.14                     | <0.001               | 9,819              | 0.37 ± 0.13                     | <0.001               |
| <b>Gestational age at birth, (days)</b>                         | 77,251          | 281.3 ± 8.9                     |                   | 281.5 ± 8.7                     | 0.4                  | 9,819              | 281.3 ± 8.7                     | 0.35                 |
| <b>Birth weight, (kg)</b>                                       | 76,900          | 3.6 (1.5-6.0)                   | 13,401            | 3.6 (1.7-5.8)                   | 0.002                | 9,819              | 3.6 (1.8-5.8) <sup>4</sup>      | 0.004                |
| <b>Gender Boys, (%)</b>                                         | 77,251          | 51.1                            | 13,401            | 50.9                            | 0.6                  | 9,819              | 49.6                            | 0.002                |
| <b>Weight at 5 months examination, (g)</b>                      | 48,422          | 7.8 (3.1-13.2)                  | 13,401            | 7.8 (3.8-13.0)                  | 0.3                  | 9,819              | 7.7 (3.8-13.0)                  | 0.004                |
| <b>Weight at 12 months examination, (g)</b>                     | 45,421          | 10.2 (4.1-18.9)                 | 13,363            | 10.2 (6.1-16.8)                 | 0.008                | 9,794              | 10.2 (6.1-16.0)                 | 0.002                |
| <b>Exclusive breastfeeding, (%)</b>                             | 42,980          | 100%                            | 13,401            | 100%                            |                      | 9,819              | 100%                            |                      |
| ≤2 months                                                       |                 | 21.9                            |                   | 18.0                            |                      |                    | 16.5                            |                      |
| >2- <4 months                                                   |                 | 51.8                            |                   | 54.0                            |                      |                    | 54.4                            |                      |
| ≥4 months                                                       |                 | 26.9                            |                   | 28.0                            | <0.001               |                    | 29.1                            | < 0.001              |
| <b>Introduction of complementary food &lt;4 months (%)</b>      | 58,024          | 8.5                             |                   | 7.0                             | <0.001               | 9,431              | 6.7                             | <0.001               |
| <b>Weight at age 7 years<sup>5</sup></b>                        | 42,180          | 24.5 (12.0-68.0)                | 13,401            | 24.3 (14.0-57.0)                | <0.001               | 9,398              | 24.1 (12.5-54.0)                | <0.001               |
| <b>Weight at age 11 years<sup>5</sup></b>                       | 28,430          | 39.0 (20.0-98.0)                | 9,532             | 37.0 (21.0-97.0)                | <0.001               | 9,819              | 37.0 (21.0-97.0)                | <0.001               |

<sup>1</sup>Values are percentages for categorical variables, means (SD) for continuous variables with a normal distribution, or medians (range) for continuous variables with a skewed distribution, <sup>2</sup>P-value comparing the population available for analyses with 7 year BMI compared to the larger group, who had some information, but were not included in the final analyses, assessed using one-way-ANOVA for continuous variables with a normal distribution, Kruskal-Wallis test for continuous variables with a skewed distribution and chi-square tests for categorical variables, <sup>3</sup>P-value comparing the population available for analyses with 11 year BMI compared to the group who had some information, but were not included in the final analyses, <sup>4</sup>Birth weight is lowest (3550g) in this group but only visible on the 2<sup>nd</sup> decimal, <sup>5</sup>The number with available weight information at age 7 and 11 years is higher than the n in the 7 and 11 year BMI sample, since these analytical samples were based on a study population with information on height, date of the measurements and all relevant covariates.
