# Supplementary material for: Overweight in childhood of exclusively breastfed infants with a high weight at 5 months
Source: PubMed Central journal article supplement (PMC7729543; doi:10.1111/mcn.13057), 2020-08-20
Supplement: MCN-17-e13057-s002.pdf [file MCN-17-e13057-s002.pdf]

**Supplementary Table 2. Anthropometric characteristics of the children at 11 years according to tertiles of exclusive breastfeeding and weight for age at 5 months, n= 9,819**

| Duration of exclusive breastfeeding    | n <sup>1</sup> | Weight 5 months <sup>2</sup> | <u>≤2 months</u>         | <u>&gt;2- &lt;4 months</u> | <u>≥4 months</u>         | p-value <sup>4</sup> |
|----------------------------------------|----------------|------------------------------|--------------------------|----------------------------|--------------------------|----------------------|
|                                        |                |                              | Mean ± SD/% <sup>3</sup> | Mean ± SD/% <sup>3</sup>   | Mean ± SD/% <sup>3</sup> |                      |
| Height at 11 years, (cm)               | 9,605 / 214    | ≥2.5 SD                      | 157.7 (140.0-170.0)      | 153.8 (138.0-169.0)        | 152.5 (140.0-164.0)      | 0.002                |
|                                        |                | <2.5 SD                      | 149.5 (102.0-148.0)      | 149.1 (100.0-150.0)        | 149.1 (102.0-142.0)      | 0.1                  |
| Weight at 11 years, (kg)               |                | ≥2.5 SD                      | 47.7 (32.0-72.0)         | 44.7 (30.0-64.0)           | 43.0 (30.0-60.0)         | 0.04                 |
|                                        |                | <2.5 SD                      | 39.5 (15.0-54.0)         | 38.3 (14.1-43.0)           | 38.2 (12.5-42.4)         | <0.0001              |
| BMI z-score <sup>5</sup> at 11 years   |                | ≥2.5 SD                      | 0.68 ± 1.0               | 0.64 ± 0.8                 | 0.51 ± 0.8               | 0.5                  |
|                                        |                | <2.5 SD                      | 0.10 ± 1.1               | -0.05 ± 0.9                | -0.07 ± 1.0              | <0.0001              |
| Overweight <sup>6</sup> at age 11, (%) |                | ≥2.5 SD                      | 19.5                     | 20.0                       | 20.7                     | 0.99                 |
|                                        |                | <2.5 SD                      | 13.0                     | 7.8                        | 8.6                      | <0.0001              |

<sup>1</sup>The numbers are infants < 2.5 SD weight for age at 5 months /infants ≥ 2.5 SD weight for age at 5 months, <sup>2</sup>High infant weight (at 5 months) is defined as ≥ 2.5 SD above the median weight-for-age (WHO), <sup>3</sup>Values are percentages for categorical variables, means (SD) for continuous variables with a normal-like distribution, or medians (range) for continuous variables with a skewed distribution, <sup>4</sup>P-value comparing groups according to duration of exclusive breastfeeding, assessed using one-way-ANOVA for continuous variables with a normal-like distribution, Kruskal Wallis test for continuous variables with a skewed distribution and chi-square tests for categorical variables, <sup>5</sup>BMI z-score are calculated according to the LMS method, <sup>6</sup>Overweight is categorized according to the International Obesity Taskforce reference and obesity is included in the overweight category.
