# Supplementary material for: Overweight in childhood of exclusively breastfed infants with a high weight at 5 months
Source: PubMed Central journal article supplement (PMC7729543; doi:10.1111/mcn.13057), 2020-08-20
Supplement: MCN-17-e13057-s003.pdf [file MCN-17-e13057-s003.pdf]

**Supplementary Table 3. Associations between duration of exclusive breastfeeding, infant weight and overweight at age 11 years, n = 9,819**

| Exposure                           | Overweight <sup>1</sup> at age 11 years |      |              |                             |                          |               |                             |
|------------------------------------|-----------------------------------------|------|--------------|-----------------------------|--------------------------|---------------|-----------------------------|
|                                    | Breastfeeding                           | OR   | 95% CI       | <i>p-value</i> <sup>2</sup> | OR adjusted <sup>3</sup> | 95% CI        | <i>p-value</i> <sup>2</sup> |
| Weight for age at 5 months <2.5 SD | ≤2 months                               | 1.59 | (1.30, 1.93) |                             | 1.26                     | (1.00, 1.58)  |                             |
|                                    | >2- <4 months                           | 0.89 | (0.75, 1.05) |                             | 0.97                     | (0.81, 1.17)  |                             |
|                                    | ≥ 4 months                              | 1.00 | -            |                             | 1.00                     | -             |                             |
| Weight for age at 5 months ≥2.5 SD | ≤2 months                               | 2.57 | (1.17, 5.63) |                             | 5.50                     | (2.72, 11.13) |                             |
|                                    | >2-<4 months                            | 2.65 | (1.65, 4.26) |                             | 3.34                     | (2.08, 5.37)  |                             |
|                                    | ≥4 months                               | 2.77 | (1.45, 5.29) | 0.39                        | 3.16                     | (1.66, 6.04)  | 0.63                        |

<sup>1</sup>Overweight is categorized according to the International Obesity Task Force reference, <sup>2</sup> P-values are for the interaction between exclusive breastfeeding and infant weight, <sup>3</sup>Adjusted for: maternal pre-pregnancy BMI, paternal BMI, maternal smoking during pregnancy (continuous), maternal physical activity during pregnancy (3 levels), weekly gestational weight gain, socio-economic status of the mother (3 levels) and child sex and birth weight (continuous).
