# Supplementary material for: Overweight in childhood of exclusively breastfed infants with a high weight at 5 months
Source: PubMed Central journal article supplement (PMC7729543; doi:10.1111/mcn.13057), 2020-08-20
Supplement: MCN-17-e13057-s004.pdf [file MCN-17-e13057-s004.pdf]

**Supplementary Table 4. Associations between duration of exclusive breastfeeding, infant weight and BMI z-score at age 11 years**

| Exposure                           | BMI z-score <sup>1</sup> at age 11 years |               |               |                              |                               |               |                              |
|------------------------------------|------------------------------------------|---------------|---------------|------------------------------|-------------------------------|---------------|------------------------------|
|                                    | Breastfeeding                            | $\beta$ crude | 95% CI        | <i>p</i> -value <sup>2</sup> | $\beta$ adjusted <sup>3</sup> | 95% CI        | <i>p</i> -value <sup>2</sup> |
| Weight for age at 5 months <2.5 SD | ≤ 2 months                               | 0.17          | (0.11, 0.23)  |                              | 0.03                          | (-0.02, 0.09) |                              |
|                                    | >2- <4 months                            | 0.01          | (-0.03, 0.06) |                              | -0.01                         | (-0.05, 0.03) |                              |
|                                    | ≥ 4 months                               | 0.00          | -             |                              | 0.00                          | -             |                              |
| Weight for age at 5 months ≥2.5 SD | ≤ 2 months                               | 0.74          | (0.45, 1.04)  |                              | 0.50                          | (0.22, 0.77)  |                              |
|                                    | >2- <4 months                            | 0.71          | (0.53, 0.89)  |                              | 0.51                          | (0.34, 0.68)  |                              |
|                                    | ≥ 4 months                               | 0.57          | (0.32, 0.82)  | 0.67                         | 0.40                          | (0.16, 0.63)  | 0.68                         |

<sup>1</sup>BMI z-score was calculated according to the LMS method, <sup>2</sup>*p*-values are for the between duration of exclusive breastfeeding and infant weight, <sup>3</sup>Adjusted for: Maternal pre-pregnancy BMI, paternal BMI, maternal smoking during pregnancy (grams of tobacco per day), maternal physical activity during pregnancy (3 levels), weekly gestational weight gain, socio-economic status of the mother (3 levels), child sex and birth weight (continuous).
