# Supplementary material for: Overweight in childhood of exclusively breastfed infants with a high weight at 5 months
Source: PubMed Central journal article supplement (PMC7729543; doi:10.1111/mcn.13057), 2020-08-20
Supplement: MCN-17-e13057-s005.pdf [file MCN-17-e13057-s005.pdf]

**Supplementary Table 5. Associations between duration of exclusive breastfeeding, overweight<sup>1</sup> and BMI z-score at age 7 years for infants  $\geq 2.5$  SD weight for age at 5 months, n=316.**

| <b>Exposure breastfeeding</b> | <b>OR crude</b> | <b>95% CI</b> | <b>OR adjusted<sup>2,3</sup></b> | <b>95% CI</b> |
|-------------------------------|-----------------|---------------|----------------------------------|---------------|
| ≤2 months                     | 1.31            | (0.66, 2.59)  | 1.05                             | (0.48, 2.27)  |
| >2- <4 months                 | 1.06            | (0.59, 1.90)  | 1.01                             | (0.54, 1.91)  |
| ≥4 months                     | 1.00            | -             | 1.00                             | -             |
|                               | <b>β crude</b>  | <b>95% CI</b> | <b>β adjusted<sup>2,3</sup></b>  | <b>95% CI</b> |
| ≤2 months                     | 0.29            | (-0.01, 0.60) | 0.14                             | (-0.16, 0.43) |
| >2- <4 months                 | 0.04            | (-0.21, 0.30) | 0.00                             | (-0.23, 0.24) |
| ≥4 months                     | 0.00            | -             | 0.00                             | -             |

<sup>1</sup>Overweight is categorized according to the International Obesity Task Force reference, <sup>2</sup>Adjusted for: maternal pre-pregnancy BMI, paternal BMI, maternal smoking during pregnancy (continuous), maternal physical activity during pregnancy (3 levels), weekly gestational weight gain, socio-economic status of the mother (3 levels) child sex and birth weight (continuous), <sup>3</sup>Test for trend was non-significant, p>0.05.
