# Supplementary material for: Overweight in childhood of exclusively breastfed infants with a high weight at 5 months
Source: PubMed Central journal article supplement (PMC7729543; doi:10.1111/mcn.13057), 2020-08-20
Supplement: MCN-17-e13057-s006.pdf [file MCN-17-e13057-s006.pdf]

**Supplementary Table 6. Associations between duration of exclusive breastfeeding, overweight<sup>1</sup> and BMI z-score at age 11 years for infants  $\geq 2.5$  SD weight for age at 5 months, n=214.**

| <b>Exposure Breastfeeding</b> | <b>OR crude</b>                 | <b>95% CI</b> | <b>OR adjusted<sup>2,3</sup></b>                 | <b>95% CI</b> |
|-------------------------------|---------------------------------|---------------|--------------------------------------------------|---------------|
| $\leq 2$ months               | 1.05                            | (0.48, 2.27)  | 0.60                                             | (0.17, 2.08)  |
| >2- <4 months                 | 1.02                            | (0.54, 1.91)  | 0.84                                             | (0.33, 2.14)  |
| $\geq 4$ months               | 1.00                            | -             | 1.00                                             | -             |
|                               | <b><math>\beta</math> crude</b> | <b>95% CI</b> | <b><math>\beta</math> adjusted<sup>2,3</sup></b> | <b>95% CI</b> |
| $\leq 2$ months               | 0.17                            | (-0.17, 0.51) | 0.10                                             | (-0.20, 0.40) |
| >2- <4 months                 | 0.13                            | (-0.14, 0.40) | 0.12                                             | (-0.12, 0.35) |
| $\geq 4$ months               | 0.00                            | -             | 0.00                                             | -             |

<sup>1</sup>Overweight is categorized according to the International Obesity Taskforce reference, <sup>2</sup>Adjusted for: maternal pre-pregnancy BMI, paternal BMI, maternal smoking during pregnancy (continuous), maternal physical activity during pregnancy (3 levels), weekly gestational weight gain, socio-economic status of the mother (3 levels) child sex and birth weight, <sup>3</sup>Test for trend was non-significant,  $p > 0.05$ .
